# Supplementary material for: The antibacterial activity of three zeolitic-imidazolate frameworks and zinc oxide nanoparticles derived from them
Source: Royal Society of Chemistry journal article supplement (doi:10.1039/d4ra00447g), 2024-01-01
Supplement: d4ra00447g1.pdf [file d4ra00447g1.pdf]

## **Supporting Information**

### **Antibacterial Activity of Three Zeolitic-Imidazolate Frameworks and Zinc Oxide Nanoparticles Drived from them**

**Pouya Khattami Kermanshahi, Kamran Akhbari\***

School of Chemistry, College of Science, University of Tehran, Tehran, Iran.  
P.O. Box 14155-6455; Tel.: +98 21 61113734; fax: +98 21 66495291. E-mail address:  
akhbari.k@ut.ac.ir (K. Akhbari)

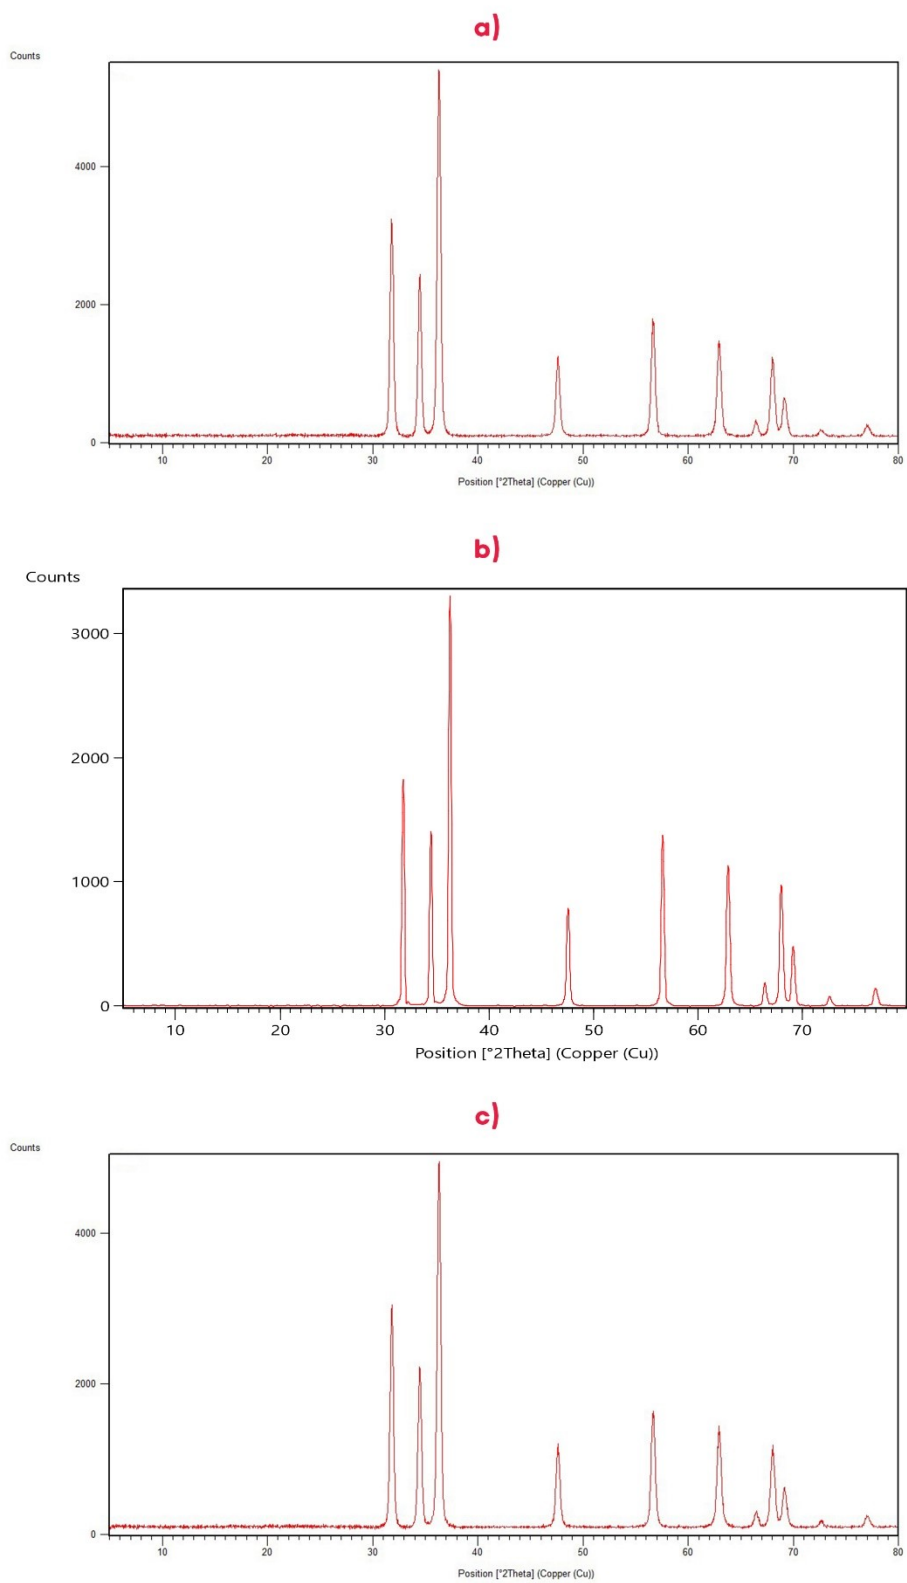

**Figure S1.** The PXRD patterns of three types of zinc oxide driven from a) ZIF-4, b) ZIF-7 and c) ZIF-8.

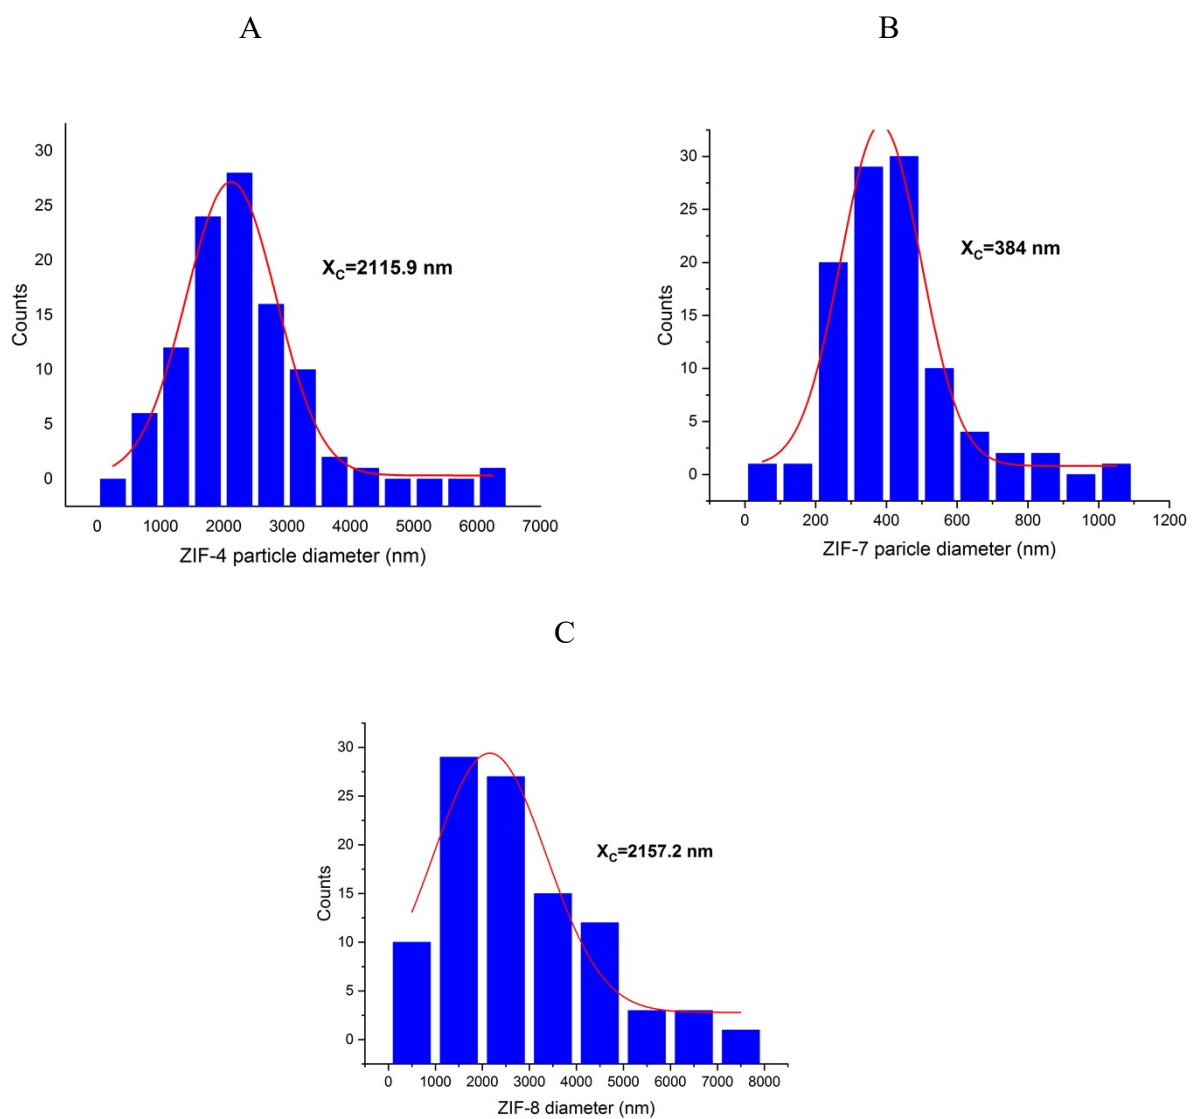

**Figure S2.** Graphs showing the average diameter of particles in a) ZIF-4, B) ZIF-7 and C) ZIF-8.

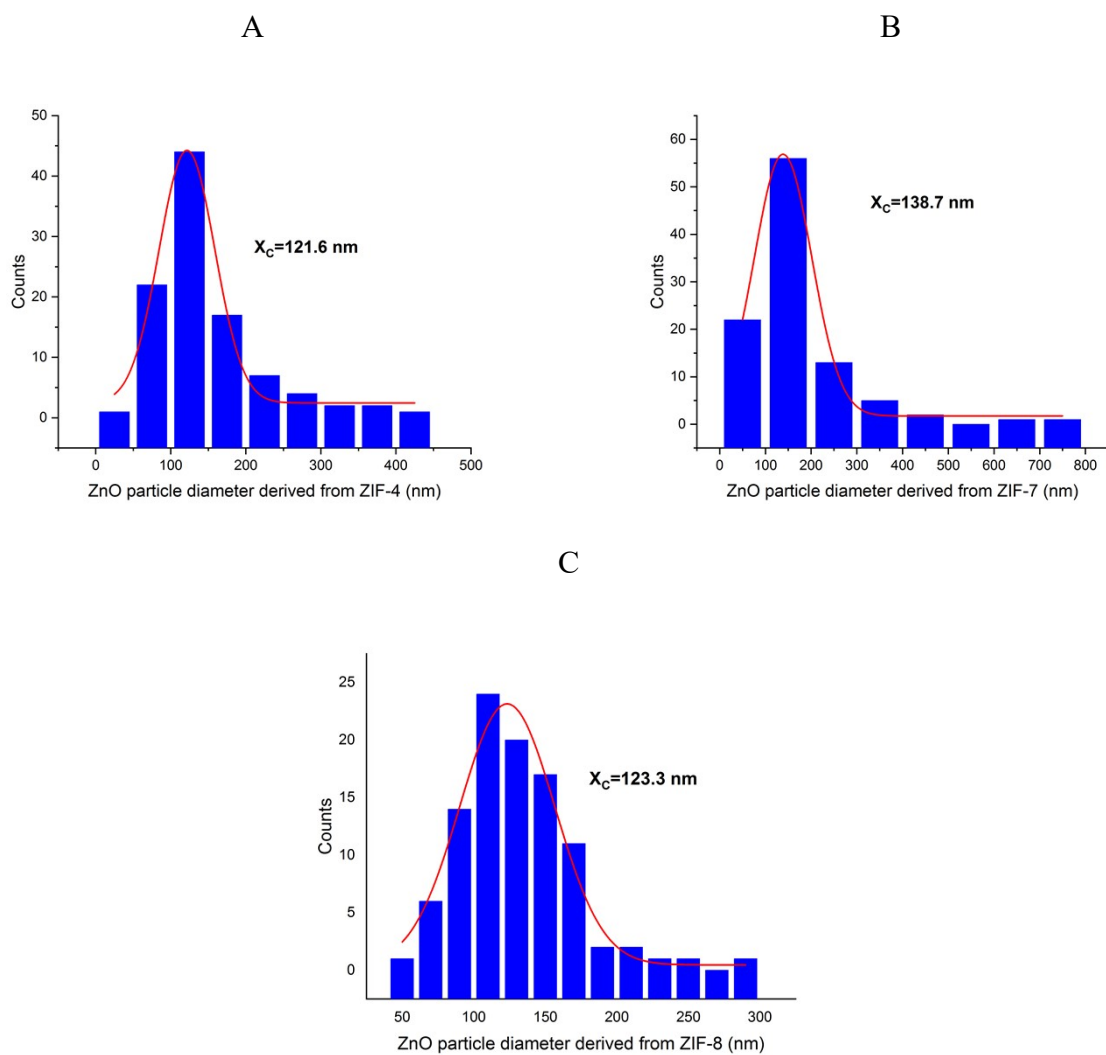

**Figure S3.** Graphs showing the average diameter of particles in a) ZnO derived from ZIF-4, B) ZnO derived from ZIF-7 and C) ZnO derived from ZIF-8.
